1 **Sulforaphane Alters the Acidification of the Vacuole to Trigger Cell Death**

2

3

4

5 Alexander Wilcox<sup>1\*</sup>, Michael Murphy<sup>1\*</sup>, Douglass Tucker<sup>1\*</sup>, David Laprade<sup>1</sup>, Breton

6 Roussel<sup>1</sup>, Victoria Hallisey<sup>1</sup>, Christopher Chin<sup>2</sup>, Abraham Brass<sup>2</sup>, and Nicanor

7 Austriaco<sup>1</sup>

8

9

10

11 <sup>1</sup>Department of Biology, Providence College, 1 Cunningham Square, Providence, RI

12 02918, USA.

13 <sup>2</sup>Department of Microbiology and Physiological Systems, University of

14 Massachusetts School of Medicine, 368 Plantation St., ASC 1001, Worcester, MA

15 01605, USA.

16

17

18

19

20

21 \*These authors contributed equally to the manuscript.

22 **Abstract**

23 Sulforaphane (SFN) is a compound [1-isothiocyanato-4-(methylsulfinyl)-  
24 butane] found in broccoli and other cruciferous vegetables that is currently of  
25 interest because of its potential as a chemopreventive and a chemotherapeutic drug.  
26 Recent studies in a diverse range of cellular and animal models have shown that SFN  
27 is involved in multiple intracellular signaling pathways that regulate cell death, cell  
28 cycle progression, and cell invasion. In order to better understand the mechanisms  
29 of action behind SFN-induced cell death, we undertook an unbiased genome wide  
30 screen with the yeast knockout (YKO) library to identify SFN sensitive (SFN<sup>S</sup>)  
31 mutants. Our mutants were enriched with knockouts in genes linked to vacuolar  
32 function suggesting a link between this organelle and SFN's mechanism of action in  
33 yeast. Our subsequent work revealed that SFN increases the vacuolar pH of yeast  
34 cells and that varying the vacuolar pH can alter the sensitivity of yeast cells to the  
35 drug. In fact, several mutations that lower the vacuolar pH in yeast actually made  
36 the cells resistant to SFN (SFN<sup>R</sup>). Finally, we show that human lung cancer cells with  
37 more acidic compartments are also SFN<sup>R</sup> suggesting that SFN's mechanism of action  
38 identified in yeast may carry over to higher eukaryotic cells.

## 39 **Introduction**

40           The consumption of broccoli and other cruciferous vegetables belonging to  
41 the *Brassica* family has been shown to have protective effects against several types  
42 of cancer, including prostate, breast, colon, and lung cancer. [1, 2] Though these  
43 plants contain a diverse range of metabolites and antioxidants, the chemical agents  
44 believed to be responsible for these effects are the naturally occurring organosulfur  
45 compounds called isothiocyanates (ITCs;  $R-N=C=S$ ). [3, 4]. These molecules are the  
46 products of the reaction of plant glucosinolates with myrosinase, an enzyme  
47 released by the disruption of plant tissues.

48           Studies undertaken during the past two decades have reported that the  
49 isothiocyanate in cruciferous vegetables primarily responsible for their  
50 chemopreventive effects is the isothiocyanate called sulforaphane (SFN; 1-  
51 isothiocyanato-4-(methylsulfinyl)butane). [5] Numerous experiments have shown  
52 that SFN can defend healthy cells against chemical and radiation induced  
53 carcinogenesis and can inhibit the proliferation, migration, and survival of tumor  
54 cells. [6, 7] There is also extensive evidence that reveals that SFN is a  
55 chemoprevention agent against cardiovascular diseases, neurodegenerative  
56 diseases, autism, and diabetes. [8-10]

57           Sulforaphane affects many molecular targets in cellular and animal models.  
58 However, its cytoprotective function has been attributed primarily to its diverse  
59 abilities. These include SFN's abilities to inhibit phase 1 metabolizing enzymes  
60 (mostly cytochrome P450); to alter the localization of the transcription factor Nrf2  
61 so that it can enter the nucleus to regulate the basal and inducible expression of a

62 multitude of antioxidant proteins, detoxification enzymes, and xenobiotic  
63 transporters; and to suppress pro-inflammatory responses within the cell. [4] SFN is  
64 also known to inhibit histone deacetylase, which could explain its ability to induce  
65 cell cycle arrest and apoptosis, and to regulate different microRNAs. [11-13] Finally,  
66 there is data that suggests that SFN can trigger cell death by upregulating caspases  
67 and downregulating anti-apoptotic factors. [14-16]

68 In order to better understand the mechanisms of action of SFN in eukaryotes  
69 and to possibly uncover novel ones, we undertook an unbiased genome wide screen  
70 with the *Saccharomyces cerevisiae* knockout (YKO) library, a collection of 4,775  
71 individual yeast strains, each of which contains a deletion of a single non-essential  
72 yeast ORF, to identify mutations that affect the cell's sensitivity to SFN. The YKO  
73 collection has been used extensively over the past decade to identify the  
74 mechanisms of actions of a wide range of small molecules and drugs. [17, 18] Our  
75 screen uncovered numerous SFN<sup>S</sup> mutants. Notably, they were enriched with  
76 knockouts in genes linked to vacuolar function suggesting a link between this  
77 organelle and SFN's mechanism of action in yeast. Our subsequent work revealed  
78 that SFN increases the vacuolar pH of yeast cells and that varying the vacuolar pH  
79 can alter the sensitivity of yeast cells to SFN. In fact, several mutations that lower  
80 the vacuolar pH in yeast actually made the cells resistant to SFN. Finally, we show  
81 that human lung cancer cells with decreased endosomal pH are also SFN<sup>R</sup> suggesting  
82 that SFN's mechanism of action identified in yeast may carry over to higher  
83 eukaryotic cells.

## 84 MATERIALS AND METHODS

85 *Yeast Strains and Growth Conditions.* All experiments were done with isogenic  
86 *Saccharomyces cerevisiae* strains in either the BY4742 (MAT $\alpha$  *his3 $\Delta$ 1*, *leu2 $\Delta$ 0*,  
87 *lys2 $\Delta$ 0*, *ura3 $\Delta$ 0*) or the PSY316AR (MAT $\alpha$  RDN1::ADE2 *his3-200* *leu2-3,112* *lys2*  
88 *ura3-52*) backgrounds. For all the experiments described in this paper, cells were  
89 cultured and treated using standard yeast protocols. [19] Unless noted otherwise,  
90 all drugs and reagents were purchased from SIGMA-Aldrich. Isothiocyanates were  
91 resuspended in acetonitrile as a solvent.

92

93 *Spot Assay.* Seed cultures of the BY4742 and PSY316AR yeast strains were grown  
94 overnight in YPD. Each strain was diluted to an OD<sub>600</sub> of 0.1 in fresh YPD and grown  
95 for at least 2 doublings (~5 hours). After the yeast strains entered log phase (OD<sub>600</sub>  
96 ~0.4-0.8), sulforaphane (LKT Laboratories), BITC, or PEITC was added to the  
97 cultures at the indicated concentrations with the solvent, acetonitrile alone, as the  
98 no-drug control. Following the indicated incubation times, cells were removed,  
99 spun, washed, and diluted. For each strain, a series of 10-fold dilutions was then  
100 prepared in water over a range of concentrations from 10<sup>-1</sup> to 10<sup>-5</sup> relative to the  
101 initial culture. Spots of 5 $\mu$ l from each dilution series were then plated on the  
102 indicated media and cultured at 30°C for 2 days. All spot assays were repeated at  
103 least three times and a representative experiment is shown.

104

105 *Liquid Viability Assay.* Seed cultures of each yeast strain were grown overnight in  
106 YPD. Each strain was diluted to an OD<sub>600</sub> of 0.1 in fresh YPD and grown for at least 2

107 doublings (~5 hours). After the yeast strains entered log phase ( $OD_{600} \sim 0.4-0.8$ ),  
108 SFN was added at the indicated concentrations. Cell viability was measured at the  
109 indicated time points following drug addition using a Nexcelom Vision Cell Analyzer  
110 with propidium iodide as a vital stain ( $1\mu\text{g/ml}$ ). Statistical significance was  
111 determined with the Student's t-test, using Graph Pad Prism 6. By default, one  
112 asterisk is  $p < 0.05$ ; two asterisks is  $p < 0.01$ ; three asterisks is  $p < 0.001$ ; and four  
113 asterisks is  $p < 0.0001$ .

114

115 *Genetic Screen for SFN<sup>S</sup> Mutants.* Seed cultures of individual yeast strains from the  
116 BY4742 knockout library (Dharmacon Yeast Knock Out MATalpha Collection) were  
117 grown overnight at  $30^\circ\text{C}$  in 96-well plates in complete synthetic defined (SD) media.  
118 A  $10\mu\text{l}$  aliquot of each culture was then transferred to a well of two different sets of  
119 96-well plates, each of which contained  $150\mu\text{l}$  fresh complete SD media. Cells were  
120 allowed to reach exponential phase ( $OD_{600} \sim 0.4-0.8$ ). SFN was then added to one of  
121 the sets of 96-well plates to a final concentration of  $200\mu\text{g/ml}$ . Relative growth for  
122 SFN<sup>S</sup> mutants was determined by visual inspection of the wells, comparing wells  
123 with drug with wells without drug, after they had been cultured at  $30^\circ\text{C}$  for 2 days.

124

125 *Functional Gene Ontology Annotation.* The Cytoscape 2.8.3 plugin BiNGO (v2.44) was  
126 used to identify enriched biological processes in the SFN<sup>S</sup> mutant pool after  
127 Benjamini & Hochberg false discovery correction for multiple hypothesis testing.

128

129 *Confocal Imaging of Yeast Cells.* BCECF-AM (Molecular Probes, Eugene, OR) staining  
130 was performed as described [20] with the following modifications: Seed cultures  
131 were grown overnight in YPD. Each culture was then diluted to an OD<sub>600</sub> of 0.1 in  
132 fresh YPD and grown for at least 2 doublings (~5 hours). Once the cells were in log  
133 phase, sulforaphane, BITC, or PEITC were added to the cultures at the indicated  
134 concentrations with the solvent, acetonitrile alone, as the no-drug control. After they  
135 were allowed to grow at 30°C for an additional 18 hours, cells were harvested,  
136 washed, and resuspended in an equivalent amount of APG (a synthetic minimal  
137 medium containing 10mM arginine, 8mM phosphoric acid, 2% glucose, 2mM  
138 MgSO<sub>4</sub>, 1mM KCl, 0.2mM CaCl<sub>2</sub>, and trace minerals and vitamins titrated to pH 7.0  
139 with KOH and 10mM MES). Two 200µl aliquots of each yeast culture were then  
140 transferred to a 96-well plate. They were incubated with 50 µM BCECF-AM at 30°C  
141 for 30 min, washed, and resuspended in APG medium to be imaged. Images were  
142 captured with a Zeiss LSM 700 Laser Confocal Microscope (Zeiss, Thornwood, NY),  
143 and processed using the Zen 2009 software package.

144

145 *Assay for the Measurement of Yeast Vacuolar pH.* Seed cultures of each yeast strain  
146 were grown overnight in YPD. Each strain was diluted to an OD<sub>600</sub> of 0.1 in fresh  
147 YPD and grown for at least 2 doublings (~5 hours). After the yeast strains entered  
148 log phase (OD<sub>600</sub> ~0.4-0.8), cells were spun down and resuspended in APG media  
149 titrated to pH 3, 5, 7, 9, or 11. After an additional hour of growth in this media, the  
150 cells were incubated with 50µM BCECF-AM at 30°C for 30 min, washed, and  
151 resuspended in APG medium to be imaged. Images were captured with a Zeiss LSM

152 700 Laser Confocal Microscope (Zeiss, Thornwood, NY), and processed using the  
153 Zen 2009 software package. The vacuolar pH was estimated from a calibration curve  
154 that plotted the vacuolar pH of cells grown in APG media titrated to different pH  
155 values against the fluorescence intensities measured by the LSM700. Results and  
156 statistics were plotted using Graph Pad Prism 6.

157

158 *Cell Lines.* The pQCXIP and IFITM3 plasmids and A549 cell lines were characterized  
159 previously. [21, 22] Briefly, A549 cells were grown in complete DMEM (Invitrogen  
160 #11965) with 10% FBS (Invitrogen). A549 cells were made by gamma-retroviral  
161 transduction with either an empty vector control or a vector containing the full-  
162 length human *IFITM3* cDNA. The cells were then selected with 2 $\mu$ g/mL puromycin  
163 in complete DMEM. Expression of IFITM3 was confirmed by Western blotting using  
164 an SDS-PAGE gel and an anti-IFITM3 antibody against the n-terminus of IFITM3  
165 (Abgent #AP1153a).

166

167 *Lysotracker Red Staining.* LysoTracker Red staining of A549 cells was done as  
168 described previously.[22] Briefly, A549 cells transduced with the empty vector or  
169 overexpressing IFITM3 were plated on coverslips and cultured for 4 hours in  
170 complete DMEM with either 20 $\mu$ M DMSO or SFN at 37°C. [16] For the last hour,  
171 LysoTracker Red DND-99 (Invitrogen) was added in the corresponding media to the  
172 cells. Cells were fixed with 4% PFA and stained with DAPI (blue). The coverslips  
173 were then imaged by a Leica SP-5 confocal microscope.

174



175 *SFN Survival Assay for Mammalian Cell Lines.* Cells were plated in a 96-well plate at  
176 8000 cells per well. They were then cultured with either 20 $\mu$ M DMSO or SFN in  
177 complete DMEM for 24 hours. [16] Cells were then fixed and stained with Hoechst  
178 and imaged by an IXM microscope. Meta-express software was used to count the  
179 number of cells indicated by DAPI staining.

## 180 **Results and Discussion**

### 181 Sulforaphane Inhibits the Growth of Wild Type Yeast Cells.

182 Isothiocyanates have been used as antimicrobials, mainly for food  
183 preservation and plant pathogen control. [23] However, since sulforaphane (SFN),  
184 to the best of our knowledge at the time, had never been tested on yeast cells, we  
185 began by investigating whether the drug was able to inhibit the growth of wild type  
186 *Saccharomyces cerevisiae* cells. We plated ten-fold serial dilutions of wildtype cells  
187 from the PSY316 strain background on synthetic defined (SD) media with increasing  
188 concentrations of SFN (0-200 µg/ml). After two days of growth at 30°C, it was clear  
189 that SFN inhibited the growth of the strain (Figure 1A).

190 Similar results were obtained when we measured the viability of the cells  
191 grown in liquid cultures containing 100 µg/ml SFN using propidium iodide as a vital  
192 stain, suggesting that the drug actually kills rather than merely inhibits yeast cell  
193 growth (Figure 1B). A parallel experiment with wildtype cells from the BY4742  
194 strain background showed that the ability of SFN to trigger yeast cell death is not  
195 specific to a particular strain background (Figure 1B).

196 Given our laboratory's wider interest in apoptotic-like cell death in yeast  
197 [24], we checked to see if SFN induces the characteristic hallmarks of this kind of  
198 cell death. We discovered that SFN-induced cell death neither generated reactive  
199 oxygen species (ROS), as determined by dihydroxyrhodamine 123 staining, nor was  
200 inhibited by the absence of oxygen (data not shown). Both are hallmark  
201 characteristics of apoptosis in yeast [25] suggesting that SFN-induced cell death is  
202 nonapoptotic in nature.

203

204 A Genome-wide Screen Links Vacuolar Acidification to SFN's Mechanism of Action.

205           In order to better understand the mechanisms of action behind SFN-induced  
206 cell death, we undertook an unbiased genome wide screen to identify mutations that  
207 alter the cell's sensitivity to SFN using the *Saccharomyces cerevisiae* knockout (YKO)  
208 library, a collection of 4,775 individual yeast strains in the BY4742 background,  
209 each of which contains a deletion of a single non-essential yeast ORF. Our initial  
210 experiments had revealed that 200µg/ml SFN significantly inhibits the growth of  
211 wildtype BY4742 yeast cells grown in 96-well liquid SD cultures for 48 hours, so we  
212 screened the YKO library for mutant BY4742 strains that were unable to grow under  
213 these conditions.

214           Each mutant strain was isolated by visually comparing 96-well plates with  
215 SFN to control plates without SFN, to identify wells that had little or no turbidity  
216 after 48 hours (Figure 2A). After screening the entire YKO library twice, we  
217 identified 311 mutant strains that consistently were unable to grow in liquid SD  
218 cultures containing 200µg/ml SFN after two days (Supplementary Table S1).  
219 Functional annotation utilizing gene ontology (GO) terms revealed that our screen  
220 had preferentially isolated mutants in genes involved in cellular metabolism, in the  
221 cell's response to stress, and in the regulation of cell metabolism (Figure 2B).  
222 However, a cursory search through the *Saccharomyces* Genome Database (SGD)  
223 revealed that many, if not most, of these loss-of-function mutants are also sensitive  
224 to a wide range of other cellular insults and stresses suggesting that they may not be  
225 SFN-specific.

226 Intriguingly, however, we noticed that our SFN<sup>S</sup> mutants were significantly  
227 enriched for genes involved in vacuolar function, especially in vacuolar acidification  
228 and/or pH regulation (Figure 2B). The vacuole has been implicated in the  
229 mechanism of action of numerous other drugs in yeast. [26-28] Our SFN<sup>S</sup> vacuolar  
230 function deletion mutants included knockouts of *VMA1*, *VMA2*, and *VMA4*, which  
231 encode three of the subunits of the vacuolar H(+)-ATPase (V-ATPase) that is  
232 required for vacuolar acidification [29, 30]; knockouts of genes encoding the  
233 vacuolar fusion proteins, Vps41p, Vam3p, Vam6p, and Vam7p [31, 32]; and  
234 knockouts of the ergosterol biosynthesis proteins, Erg2p, Erg6p, and Erg24p.  
235 Notably, a previous study had linked genes involved in V-ATPase function, vacuolar  
236 fusion, and ergosterol biosynthesis to the vacuolar pH-stat of *Saccharomyces*  
237 *cerevisiae* [33], suggesting to us that the vacuole and especially the acidification of  
238 the vacuole may be linked to SFN function in yeast. A preliminary microarray and  
239 gene ontology (GO) analysis comparing ORFs upregulated in yeast cells grown in  
240 SFN as compared to cells grown in media containing other drugs such as benomyl,  
241 fluconazole, and paraquat also revealed an enrichment of vacuolar pH genes (data  
242 not shown).

243

#### 244 Lowering the Vacuolar pH Makes Yeast Cells Resistant to SFN-induced Cell Death

245 Because of the enrichment in our SFN<sup>S</sup> screen of mutants linked to vacuolar  
246 acidification, we determined whether sulforaphane altered the vacuolar pH of the  
247 cell. Staining cells grown in SFN with the vacuole specific, pH-sensitive dye, 2,7'-bis  
248 (2-carboxyethyl)-5,6-carboxyfluorescein-acetoxymethylester (BCECF-AM), revealed

249 that SFN significantly increases the vacuolar pH of two wildtype strains of different  
250 genetic backgrounds, making them more alkaline (Figure 3A and 3B).

251 From this observation, we hypothesized that SFN may trigger cell death by  
252 increasing the vacuolar pH of the yeast cell. To interrogate this possible mechanism  
253 of action, we sought to manipulate the vacuolar pH of the yeast cell to determine if  
254 this would alter the cell's sensitivity to SFN. If SFN kills by increasing the pH of the  
255 yeast vacuole, we predicted that cells with more alkaline vacuoles than wildtype  
256 cells would be more sensitive to SFN because lower concentrations of the drug  
257 would more readily push cells beyond the threshold of alkalinity that triggers death.  
258 In contrast, we anticipated that cells with more acidic vacuoles would be more  
259 resistant to SFN than wildtype because it would take higher concentrations of the  
260 drug to push cells beyond a similar threshold.

261 The regulation of vacuolar pH in yeast is complex. [20] However, we took  
262 advantage of a battery of yeast vacuole acidification mutants, first identified by Brett  
263 et al. in a screen for genes involved in the vacuolar pH-stat in yeast, to see if we  
264 could discern a relationship between the pH of the yeast vacuole and the cell's  
265 ability to grow on SFN plates. In this earlier screen, of the 107 mutants that  
266 displayed an aberrant vacuolar pH under more than one external pH condition,  
267 functional categories of transporters, membrane biogenesis, and trafficking  
268 machinery were significantly enriched.

269 Of the forty-six hyper-alkaline deletion strains determined by Brett et al. [20]  
270 to have more alkaline vacuoles than wildtype, eighteen (39%) were identified in our  
271 screen as SFN<sup>S</sup> mutants. A Fisher exact test revealed that there was a statistically

272 significant association between the two phenotypes of hyper-alkaline vacuoles and  
273 SFN<sup>S</sup> (p<0.0001). On the other hand, of the seventy-seven hyper-acidic deletion  
274 strains known to have more acidic vacuoles than their wildtype counterparts, eleven  
275 (14%) were resistant to SFN (Figure 4; Table 1). These included deletions in genes  
276 involved in transcriptional and translational regulation (*RPL21B*, *RPS23B*, *RTF1*,  
277 *HAT1*) and sterol/lipid biogenesis (*SUR1*). A third of the SFN<sup>R</sup> vacuolar hyper-acidic  
278 mutants were in genes of unknown function.

279         It is not clear why only a subset of the vacuolar hyper-acidic mutants were  
280 SFN<sup>R</sup>, and we could not identify a common molecular explanation that would link  
281 them all to reveal SFN's precise mechanism of action. However, given the complexity  
282 of the vacuolar pH-stat in yeast and the involvement of many of the hyper-acidic  
283 vacuolar genes in other physiological and metabolic pathways in the yeast cell, this  
284 should not be surprising. Nonetheless, this finding supports our claim that the  
285 mechanism of action of SFN-induced cell death involves the drug's ability to increase  
286 the cell's vacuolar pH. We still do not understand how SFN makes yeast vacuoles  
287 more alkaline and how an increase in vacuolar pH could trigger cell death. Though  
288 there is data that suggests that the V-ATPase promotes vacuolar membrane  
289 permeabilization (VMP) and nonapoptotic death in stressed yeast [34], we have  
290 discovered that SFN does not trigger this death-inducing mechanism: yeast cells  
291 grown in SFN and stained with FM4-64 to visualize their vacuolar membranes do  
292 not appear to undergo increased vacuolar fragmentation (data not shown).

293

294

## 295 Sulforaphane's Ability to Increase Vacuolar pH in Yeast is Drug Specific

296 As we have noted, the vacuole has been linked to the mechanisms of actions  
297 of a diversity of drugs and small molecules in yeast. [26-28] This raises the real  
298 possibility that an increase in the vacuolar pH is a generic response to drug insult in  
299 yeast. Recent studies suggest that the isothiocyanates phenethyl isothiocyanate  
300 (PEITC) and benzyl isothiocyanate (BITC), like SFN, can inhibit metastatic cell  
301 activity and migration. [35, 36] Therefore, to determine if SFN's ability to increase  
302 the vacuolar pH is drug-specific, we checked to see if PEITC and BITC could similarly  
303 trigger an increase in vacuolar pH. If so, it would suggest that isothiocyanates in  
304 general and not SFN specifically kill cells via this mechanism.

305 As with SFN, we began by determining if PEITC and BITC could kill yeast cells  
306 in liquid culture. We found that the levels of cell death induced by 0.094 $\mu$ g/ml PEITC  
307 and 0.746 $\mu$ g/ml BITC were comparable to that triggered by 400 $\mu$ g/ml SFN (Figure  
308 5A). However, in contrast with cells grown in SFN, yeast cells grown in PEITC and  
309 BITC did not increase their vacuolar pH as determined by BCEC-F staining (Figure  
310 5B). This suggests that SFN's mechanism of action in triggering cell death in yeast is  
311 distinct from the mechanisms used by two related isothiocyanates, PEITC and BITC,  
312 to kill this simple eukaryote.

313

## 314 Sulforaphane Increases the pH of Endosomes of Human A549 Cells

315 Given SFN's well-studied ability to alter the physiology of mammalian cells,  
316 we visually examined A549 cells, a human alveolar adenocarcinoma cell line,  
317 cultured with SFN to determine if SFN's mechanism of action in yeast cells is

318 generally applicable. We discovered that A549 cells grown in media containing 40  
319  $\mu\text{M}$  SFN and the pH-sensitive dye, LysoTracker Red, show a decreased fluorescence  
320 as compared to cells grown in the absence of drug suggesting that they have more  
321 alkaline endosomes (Figure 6A). This suggests that SFN is able to increase the pH of  
322 both yeast vacuoles and mammalian lysosomes.

323 Finally, in light of our findings that hyper-acidic yeast mutants are also  
324 resistant to SFN, we sought to make the lysosomes of mammalian cells more acidic  
325 to see if this too would in turn make them resistant to SFN. To do this, we  
326 overexpressed the Interferon-inducible Transmembrane Protein 3 (IFITM3) protein  
327 that is known to enlarge the late endosomes and lysosomal compartments as well as  
328 increase their acidity in A549 cells (Figure 6A) [22], and cultured the cells in SFN.  
329 We discovered that A549 cells overexpressing IFITM3 are relatively more resistant  
330 to SFN suggesting that lowering endosomal pH levels is also protective in higher  
331 eukaryotes (Figure 6B). It is a novel mechanism of action that should help us  
332 advance our understanding of sulforaphane's chemopreventive and  
333 chemotherapeutic functions. Interestingly, it is a mechanism not unlike the  
334 mechanism of chloroquine which is known to increase the pH of the food vacuole of  
335 the plasmodium parasite, preventing hemoglobin degradation into a nontoxic  
336 digestible form. [37]

337



338 REFERENCES

- 339 1. Steinmetz KA, Potter JD. Vegetables, fruit, and cancer prevention: a review. J  
340 Am Diet Assoc. 1996;96(10):1027-39. Epub 1996/10/01. doi: 10.1016/s0002-  
341 8223(96)00273-8. PubMed PMID: 8841165.
- 342 2. Becker TM, Juvik JA. The Role of Glucosinolate Hydrolysis Products from  
343 Brassica Vegetable Consumption in Inducing Antioxidant Activity and Reducing  
344 Cancer Incidence. Diseases. 2016;4(2). Epub 2016/06/17. doi:  
345 10.3390/diseases4020022. PubMed PMID: 28933402; PubMed Central PMCID:  
346 PMCPMC5456278.
- 347 3. van Poppel G, Verhoeven DT, Verhagen H, Goldbohm RA. Brassica vegetables  
348 and cancer prevention. Epidemiology and mechanisms. Adv Exp Med Biol.  
349 1999;472:159-68. Epub 2000/03/29. PubMed PMID: 10736624.
- 350 4. Sturm C, Wagner AE. Brassica-Derived Plant Bioactives as Modulators of  
351 Chemopreventive and Inflammatory Signaling Pathways. Int J Mol Sci. 2017;18(9).  
352 Epub 2017/09/02. doi: 10.3390/ijms18091890. PubMed PMID: 28862664; PubMed  
353 Central PMCID: PMCPMC5618539.
- 354 5. Zhang Y, Talalay P, Cho CG, Posner GH. A major inducer of anticarcinogenic  
355 protective enzymes from broccoli: isolation and elucidation of structure. Proc Natl  
356 Acad Sci U S A. 1992;89(6):2399-403. Epub 1992/03/15. PubMed PMID: 1549603;  
357 PubMed Central PMCID: PMCPMC48665.
- 358 6. Sestili P, Fimognari C. Cytotoxic and Antitumor Activity of Sulforaphane: The  
359 Role of Reactive Oxygen Species. Biomed Res Int. 2015;2015:402386. Epub

360 2015/07/18. doi: 10.1155/2015/402386. PubMed PMID: 26185755; PubMed  
361 Central PMCID: PMC4491563.

362 7. Lenzi M, Fimognari C, Hrelia P. Sulforaphane as a promising molecule for  
363 fighting cancer. *Cancer Treat Res.* 2014;159:207-23. Epub 2013/10/12. doi:  
364 10.1007/978-3-642-38007-5\_12. PubMed PMID: 24114482.

365 8. Bai Y, Wang X, Zhao S, Ma C, Cui J, Zheng Y. Sulforaphane Protects against  
366 Cardiovascular Disease via Nrf2 Activation. *Oxid Med Cell Longev.*  
367 2015;2015:407580. Epub 2015/11/20. doi: 10.1155/2015/407580. PubMed PMID:  
368 26583056; PubMed Central PMCID: PMC4637098.

369 9. Yamagishi S, Matsui T. Protective role of sulphoraphane against vascular  
370 complications in diabetes. *Pharm Biol.* 2016;54(10):2329-39. Epub 2016/02/04.  
371 doi: 10.3109/13880209.2016.1138314. PubMed PMID: 26841240.

372 10. Singh K, Zimmerman AW. Sulforaphane Treatment of Young Men with  
373 Autism Spectrum Disorder. *CNS Neurol Disord Drug Targets.* 2016;15(5):597-601.  
374 Epub 2016/04/14. PubMed PMID: 27071786.

375 11. Kaufman-Szymczyk A, Majewski G, Lubecka-Pietruszewska K, Fabianowska-  
376 Majewska K. The Role of Sulforaphane in Epigenetic Mechanisms, Including  
377 Interdependence between Histone Modification and DNA Methylation. *Int J Mol Sci.*  
378 2015;16(12):29732-43. Epub 2015/12/26. doi: 10.3390/ijms161226195. PubMed  
379 PMID: 26703571; PubMed Central PMCID: PMC4691138.

380 12. Tortorella SM, Royce SG, Licciardi PV, Karagiannis TC. Dietary Sulforaphane  
381 in Cancer Chemoprevention: The Role of Epigenetic Regulation and HDAC  
382 Inhibition. *Antioxid Redox Signal.* 2015;22(16):1382-424. Epub 2014/11/05. doi:

383 10.1089/ars.2014.6097. PubMed PMID: 25364882; PubMed Central PMCID:  
384 PMCPMC4432495.

385 13. Dacosta C, Bao Y. The Role of MicroRNAs in the Chemopreventive Activity of  
386 Sulforaphane from Cruciferous Vegetables. *Nutrients*. 2017;9(8). Epub 2017/08/22.  
387 doi: 10.3390/nu9080902. PubMed PMID: 28825609; PubMed Central PMCID:  
388 PMCPMC5579695.

389 14. Choi S, Singh SV. Bax and Bak are required for apoptosis induction by  
390 sulforaphane, a cruciferous vegetable-derived cancer chemopreventive agent.  
391 *Cancer Res*. 2005;65(5):2035-43. Epub 2005/03/09. doi: 10.1158/0008-5472.can-  
392 04-3616. PubMed PMID: 15753404.

393 15. Choi S, Lew KL, Xiao H, Herman-Antosiewicz A, Xiao D, Brown CK, et al. D,L-  
394 Sulforaphane-induced cell death in human prostate cancer cells is regulated by  
395 inhibitor of apoptosis family proteins and Apaf-1. *Carcinogenesis*. 2007;28(1):151-  
396 62. Epub 2006/08/22. doi: 10.1093/carcin/bgl144. PubMed PMID: 16920735.

397 16. Sakao K, Singh SV. D,L-sulforaphane-induced apoptosis in human breast  
398 cancer cells is regulated by the adapter protein p66Shc. *J Cell Biochem*.  
399 2012;113(2):599-610. Epub 2011/10/01. doi: 10.1002/jcb.23386. PubMed PMID:  
400 21956685; PubMed Central PMCID: PMCPMC3253217.

401 17. Smith AM, Ammar R, Nislow C, Giaever G. A survey of yeast genomic assays  
402 for drug and target discovery. *Pharmacol Ther*. 2010;127(2):156-64. Epub  
403 2010/06/16. doi: 10.1016/j.pharmthera.2010.04.012. PubMed PMID: 20546776;  
404 PubMed Central PMCID: PMCPMC2923554.

- 405 18. Giaever G, Nislow C. The yeast deletion collection: a decade of functional  
406 genomics. *Genetics*. 2014;197(2):451-65. Epub 2014/06/19. doi:  
407 10.1534/genetics.114.161620. PubMed PMID: 24939991; PubMed Central PMCID:  
408 PMCPMC4063906.
- 409 19. Dunham MJ, Gartenberg MR, Brown GW, editors. *Methods in Yeast Genetics  
410 and Genomics: A Cold Spring Harbor Laboratory Course Material*. 1 ed. Cold Spring  
411 Harbor, NY: Cold Spring Harbor Laboratory Press; 2015.
- 412 20. Brett CL, Kallay L, Hua Z, Green R, Chyou A, Zhang Y, et al. Genome-wide  
413 analysis reveals the vacuolar pH-stat of *Saccharomyces cerevisiae*. *PLoS One*.  
414 2011;6(3):e17619. Epub 2011/03/23. doi: 10.1371/journal.pone.0017619. PubMed  
415 PMID: 21423800; PubMed Central PMCID: PMCPMC3056714.
- 416 21. Brass AL, Huang IC, Benita Y, John SP, Krishnan MN, Feeley EM, et al. The  
417 IFITM proteins mediate cellular resistance to influenza A H1N1 virus, West Nile  
418 virus, and dengue virus. *Cell*. 2009;139(7):1243-54. Epub 2010/01/13. doi:  
419 10.1016/j.cell.2009.12.017. PubMed PMID: 20064371; PubMed Central PMCID:  
420 PMCPMC2824905.
- 421 22. Feeley EM, Sims JS, John SP, Chin CR, Pertel T, Chen LM, et al. IFITM3 inhibits  
422 influenza A virus infection by preventing cytosolic entry. *PLoS Pathog*.  
423 2011;7(10):e1002337. Epub 2011/11/03. doi: 10.1371/journal.ppat.1002337.  
424 PubMed PMID: 22046135; PubMed Central PMCID: PMCPMC3203188.
- 425 23. Dufour V, Stahl M, Baysse C. The antibacterial properties of isothiocyanates.  
426 *Microbiology (Reading, England)*. 2015;161(Pt 2):229-43. Epub 2014/11/08. doi:  
427 10.1099/mic.0.082362-0. PubMed PMID: 25378563.

- 428 24. Carmona-Gutierrez D, Bauer MA, Zimmermann A, Aguilera A, Austriaco N,  
429 Ayscough K, et al. Guidelines and recommendations on yeast cell death  
430 nomenclature. *Microbial cell* (Graz, Austria). 2018;5(1):4-31. Epub 2018/01/23.  
431 doi: 10.15698/mic2018.01.607. PubMed PMID: 29354647; PubMed Central PMCID:  
432 PMCPMC5772036.
- 433 25. Carraro M, Bernardi P. Calcium and reactive oxygen species in regulation of  
434 the mitochondrial permeability transition and of programmed cell death in yeast.  
435 *Cell Calcium*. 2016;60(2):102-7. Epub 2016/03/21. doi:  
436 10.1016/j.ceca.2016.03.005. PubMed PMID: 26995056; PubMed Central PMCID:  
437 PMCPMC4996716.
- 438 26. Krasowska A, Chmielewska L, Adamski R, Luczynski J, Witek S, Sigler K. The  
439 sensitivity of yeast and yeast-like cells to new lysosomotropic agents. *Cell Mol Biol*  
440 *Lett*. 2004;9(4a):675-83. Epub 2005/01/14. PubMed PMID: 15647790.
- 441 27. Liao C, Hu B, Arno MJ, Panaretou B. Genomic screening in vivo reveals the  
442 role played by vacuolar H<sup>+</sup> ATPase and cytosolic acidification in sensitivity to DNA-  
443 damaging agents such as cisplatin. *Mol Pharmacol*. 2007;71(2):416-25. Epub  
444 2006/11/10. doi: 10.1124/mol.106.030494. PubMed PMID: 17093137.
- 445 28. de Castro PA, Savoldi M, Bonatto D, Malavazi I, Goldman MH, Berretta AA, et  
446 al. Transcriptional profiling of *Saccharomyces cerevisiae* exposed to propolis. *BMC*  
447 *Complement Altern Med*. 2012;12:194. Epub 2012/10/25. doi: 10.1186/1472-  
448 6882-12-194. PubMed PMID: 23092287; PubMed Central PMCID:  
449 PMCPMC3598864.

- 450 29. Parra KJ, Chan CY, Chen J. *Saccharomyces cerevisiae* vacuolar H<sup>+</sup>-ATPase  
451 regulation by disassembly and reassembly: one structure and multiple signals.  
452 *Eukaryot Cell*. 2014;13(6):706-14. Epub 2014/04/08. doi: 10.1128/ec.00050-14.  
453 PubMed PMID: 24706019; PubMed Central PMCID: PMC4054264.
- 454 30. Kane PM. Proton Transport and pH Control in Fungi. *Adv Exp Med Biol*.  
455 2016;892:33-68. Epub 2016/01/02. doi: 10.1007/978-3-319-25304-6\_3. PubMed  
456 PMID: 26721270.
- 457 31. Wickner W. Membrane fusion: five lipids, four SNAREs, three chaperones,  
458 two nucleotides, and a Rab, all dancing in a ring on yeast vacuoles. *Annu Rev Cell*  
459 *Dev Biol*. 2010;26:115-36. Epub 2010/06/05. doi: 10.1146/annurev-cellbio-  
460 100109-104131. PubMed PMID: 20521906.
- 461 32. Orr A, Wickner W, Rusin SF, Kettenbach AN, Zick M. Yeast vacuolar HOPS,  
462 regulated by its kinase, exploits affinities for acidic lipids and Rab:GTP for  
463 membrane binding and to catalyze tethering and fusion. *Mol Biol Cell*.  
464 2015;26(2):305-15. Epub 2014/11/21. doi: 10.1091/mbc.E14-08-1298. PubMed  
465 PMID: 25411340; PubMed Central PMCID: PMC4294677.
- 466 33. Zhang YQ, Gamarra S, Garcia-Effron G, Park S, Perlin DS, Rao R. Requirement  
467 for ergosterol in V-ATPase function underlies antifungal activity of azole drugs. *PLoS*  
468 *Pathog*. 2010;6(6):e1000939. Epub 2010/06/10. doi:  
469 10.1371/journal.ppat.1000939. PubMed PMID: 20532216; PubMed Central PMCID:  
470 PMC42880581.
- 471 34. Kim H, Kim A, Cunningham KW. Vacuolar H<sup>+</sup>-ATPase (V-ATPase) promotes  
472 vacuolar membrane permeabilization and nonapoptotic death in stressed yeast. *J*

473 Biol Chem. 2012;287(23):19029-39. Epub 2012/04/19. doi:  
474 10.1074/jbc.M112.363390. PubMed PMID: 22511765; PubMed Central PMCID:  
475 PMCPMC3365936.

476 35. Lai KC, Hsiao YT, Yang JL, Ma YS, Huang YP, Chiang TA, et al. Benzyl  
477 isothiocyanate and phenethyl isothiocyanate inhibit murine melanoma B16F10 cell  
478 migration and invasion in vitro. International journal of oncology. 2017;51(3):832-  
479 40. Epub 2017/08/03. doi: 10.3892/ijo.2017.4084. PubMed PMID: 28766686.

480 36. Ma YS, Hsiao YT, Lin JJ, Liao CL, Lin CC, Chung JG. Phenethyl Isothiocyanate  
481 (PEITC) and Benzyl Isothiocyanate (BITC) Inhibit Human Melanoma A375.S2 Cell  
482 Migration and Invasion by Affecting MAPK Signaling Pathway In Vitro. Anticancer  
483 research. 2017;37(11):6223-34. Epub 2017/10/25. doi:  
484 10.21873/anticanres.12073. PubMed PMID: 29061805.

485 37. Yayon A, Cabantchik ZI, Ginsburg H. Identification of the acidic compartment  
486 of Plasmodium falciparum-infected human erythrocytes as the target of the  
487 antimalarial drug chloroquine. Embo j. 1984;3(11):2695-700. Epub 1984/11/01.  
488 PubMed PMID: 6391917; PubMed Central PMCID: PMCPMC557751.

489

490

491

## FIGURE LEGENDS

492

493 **FIGURE 1: Sulforaphane Inhibits the Growth of Wild Type Yeast Cells.** (A) Ten-  
494 fold serial dilutions of wildtype yeast cells from the PSY316 strain background were  
495 plated on synthetic defined media with increasing concentrations of SFN and  
496 allowed to grow at 30°C for two days. (B) Wildtype cells from both the BY4742 and  
497 PSY316 strain backgrounds were grown in synthetic defined liquid cultures  
498 containing 100µg/mL of SFN. The viability of the cells at the indicated time points  
499 was determined using propidium iodide as a vital stain. The difference in viabilities  
500 was deemed statistically significant by the Student's t-test ( $p < 0.05$ ). Error bars  
501 indicate standard deviations for trials with at least three independent cultures.

502

503 **FIGURE 2: A Genome-wide Screen Links Vacuolar Acidification to SFN's**  
504 **Mechanism of Action.** (A) Seed cultures of individual yeast strains from the  
505 BY4742 knockout library were grown overnight at 30°C in 96-well plates in  
506 complete synthetic defined (SD) media and then transferred to media with and  
507 without 200µg/ml of SFN. Relative growth for SFN<sup>s</sup> mutants was determined by  
508 visual inspection of the wells, comparing wells with drug with wells without drug,  
509 after they had been cultured at 30°C for 2 days. A representative pair of 96-well  
510 plates is shown. (B) Functional annotation utilizing gene ontology (GO) terms  
511 revealed that our screen had preferentially isolated mutants in genes involved in  
512 vacuolar function, especially in vacuolar acidification and/or pH regulation.



513 Asterisks indicate statistical significance of the enrichment of ORFs identified in the  
514 screen as compared to their representation in the genome.

515

516 **FIGURE 3: Sulforaphane Increases the pH of the Yeast Vacuole.** (A) Wildtype  
517 cells from the BY4742 strain background were grown in synthetic defined liquid  
518 cultures containing 200 $\mu$ g/mL of SFN and were stained with the vacuole specific,  
519 pH-sensitive dye, BCECF-AM. Cells grown in SFN were significantly more fluorescent  
520 than their counterparts grown in media without drug. (B) The vacuolar pH of the  
521 cells imaged in Figure 3A was estimated from a calibration curve that plotted the  
522 vacuolar pH of cells grown in APG media titrated to different pH values against the  
523 fluorescence intensities measured by the LSM700. The difference in viabilities was  
524 deemed statistically significant by the Student's t-test ( $p < 0.05$ ). Error bars indicate  
525 standard deviations for trials with at least three independent cultures.

526

527 **FIGURE 4: Mutations That Alter the Vacuolar pH of Yeast Cells Alter their**  
528 **Sensitivity to SFN.** Ten-fold serial dilutions of yeast cells from the BY4742 strain  
529 background with mutations in genes known to regulate the pH of the yeast vacuole  
530 were plated on synthetic defined media with 400 $\mu$ g/mL SFN and allowed to grow at  
531 30°C for two days. Deletions in genes known to increase vacuolar pH (*VMA2*)  
532 increased the sensitivity of cells to SFN while deletions in genes known to decrease  
533 vacuolar pH (*RRG8*, *RPL218*, *SUR1*, and *LCL1*) increased the resistance of cells to the  
534 drug.

535

536 **TABLE 1: Eleven Genes Whose Deletions Are Known to Decrease Vacuolar pH**  
537 **Also Increase the Resistance of Yeast Cells to Sulforaphane.**

538

539 **FIGURE 5: Sulforaphane's Ability to Increase Vacuolar pH in Yeast is Drug**

540 **Specific.** (A) Ten-fold serial dilutions of wildtype yeast cells from the BY4742 strain

541 background cultured in synthetic defined liquid cultures containing the indicated

542 drugs, were plated on SD media and allowed to grow at 30°C for two days. (B)

543 Wildtype cells from the BY4742 strain background were grown in synthetic defined

544 liquid cultures containing the indicated drugs and were stained with the vacuole

545 specific, pH-sensitive dye, BCECF-AM. Cells grown in SFN were fluorescent while

546 their counterparts grown in media with the other drugs were not.

547

548 **FIGURE 6: Sulforaphane Increases the pH of Endosomes of Human A549 Cells.**

549 (A) Cells from the A549 human alveolar adenocarcinoma cell line were cultured in

550 media containing 40µM SFN and the pH-sensitive dye, LysoTracker Red. We also

551 overexpressed the Interferon-inducible Transmembrane Protein 3 (IFITM3) protein

552 that is known to enlarge the late endosomes and lysosomal compartments as well as

553 increase their acidity in A549 cells. Cells grown with SFN are less positive for the

554 dye than cells grown in the absence of the drug suggesting that they have more

555 alkaline endosomes. (B) The viability of A549 cells with or without IFITM3 that had

556 were cultured in media with or without SFN was determined by Hoechst staining.

557 The difference in viabilities was deemed statistically significant by the Student's t-

558 test ( $p < 0.05$ ). Error bars indicate standard deviations for trials with at least three

559 independent cultures.

560

## A PSY316

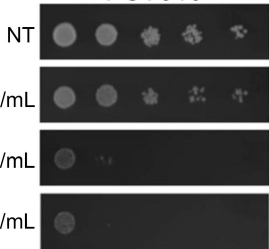

## B

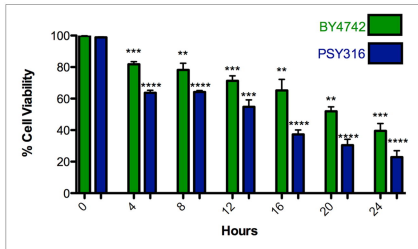

BY4742

**A**

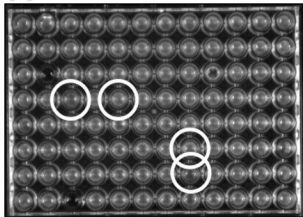

DEFINED MEDIA No Drug  
(2 days)

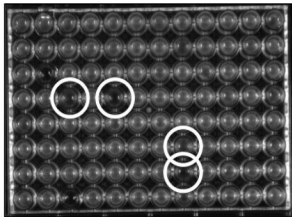

DEFINED MEDIA SFN  
(2 days)

**B**

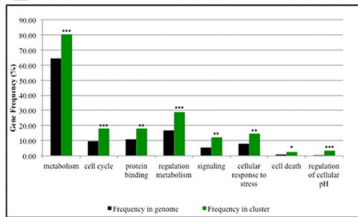

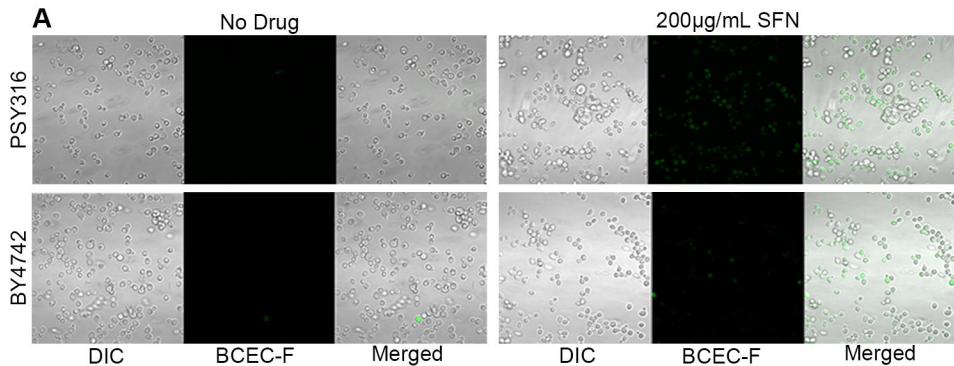

**B**

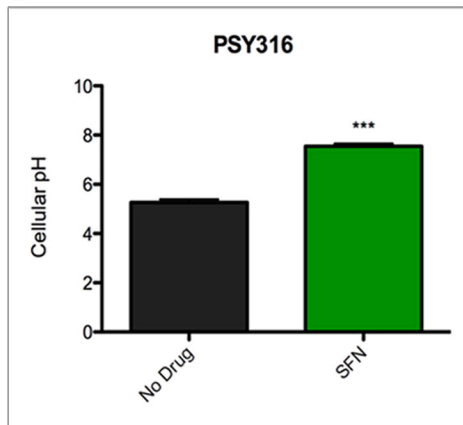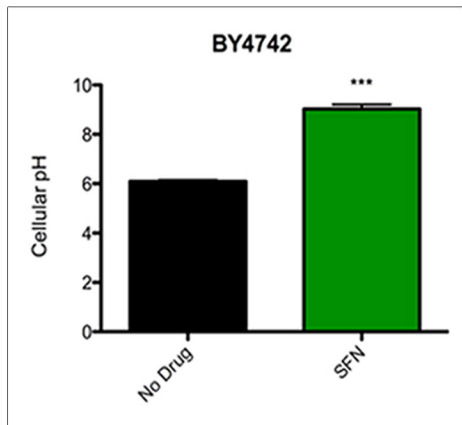

**A**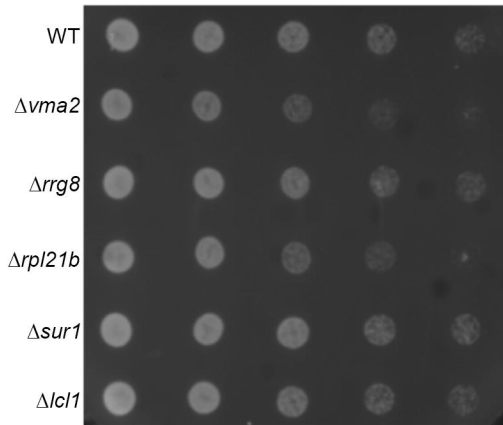

Control

**B**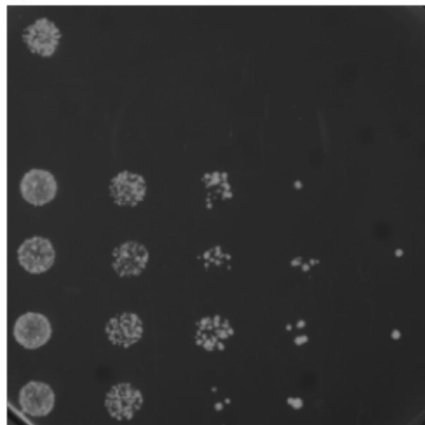

400mg/kg SFN

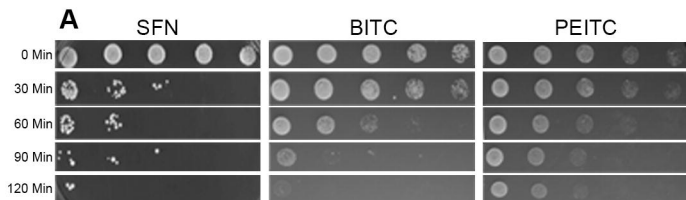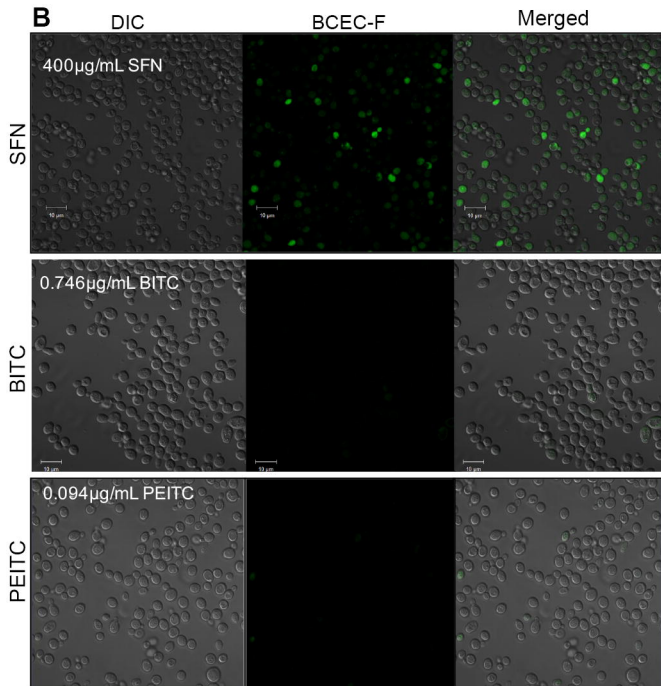



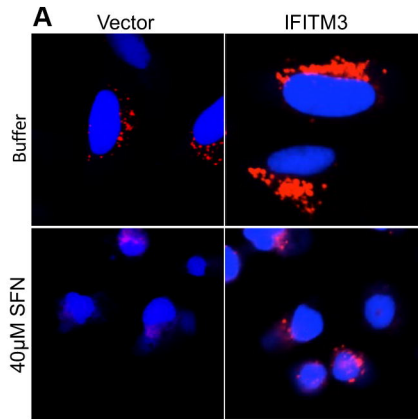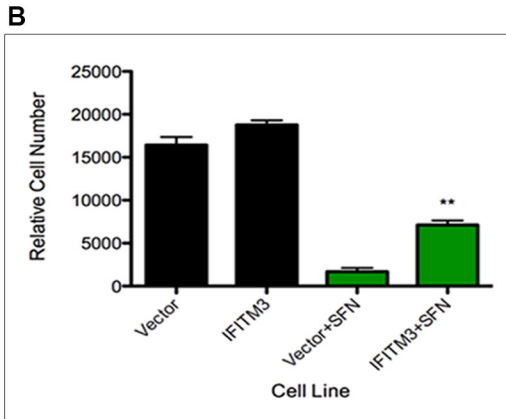

TABLE 1

| Gene Names (SFN <sup>R</sup> ) |              |
|--------------------------------|--------------|
| <i>COS12</i>                   | <i>RRG8</i>  |
| <i>ECM23</i>                   | <i>RTF1</i>  |
| <i>HAT1</i>                    | <i>SUR1</i>  |
| <i>LCL1</i>                    | <i>TRM44</i> |
| <i>RPL21B</i>                  | <i>ULA1</i>  |
| <i>RPS23B</i>                  |              |
